# Supplementary material
Source: MDPI journal article supplement (https://www.mdpi.com/2304-6740/11/8/326)
Supplement: s1 [file s1]

# PEPPSI-Type Pd(II) – NHC Complexes on the Base of p-tert-Butylthiacalix[4]arene: Synthesis and Catalytic Activities

Bulat Gafiatullin 1, Aigul Akchurina 1, Angelina Fedoseeva 1, Elza Sultanova 1, Daut Islamov 2, Konstantin Usachev 2, Vladimir Burilov 1,\* , Svetlana Solovieva 3 and Igor Antipin 1

- <sup>1</sup> Alexander Butlerov Institute of Chemistry, Kazan Federal University, 18 Kremlevskaya Str., 420008 Kazan, Russia; bul1212@yandex.ru (B.G.); lala.kzn@yandex.ru (A.A.); angelina.fedoseewa2003@yandex.ru (A.F.); elsultanova123@gmail.com (E.S.); iantipin54@yandex.ru (I.A.)
- <sup>2</sup> Laboratory for Structural Studies of Biomacromolecules, FRC Kazan Scientific Center of RAS, Lobachevskogo Str., 2/31, 420111 Kazan, Russia; daut1989@mail.ru (D.I.); k.usachev@kpfu.ru (K.U.)
- <sup>3</sup> Arbuzov Institute of Organic and Physical Chemistry, FRC Kazan Scientific Center of RAS, 8 Arbuzov Str., 420088 Kazan, Russia; evgersol@yandex.ru
- \* Correspondence: ultrav@bk.ru; Tel.: +7-843-2337344

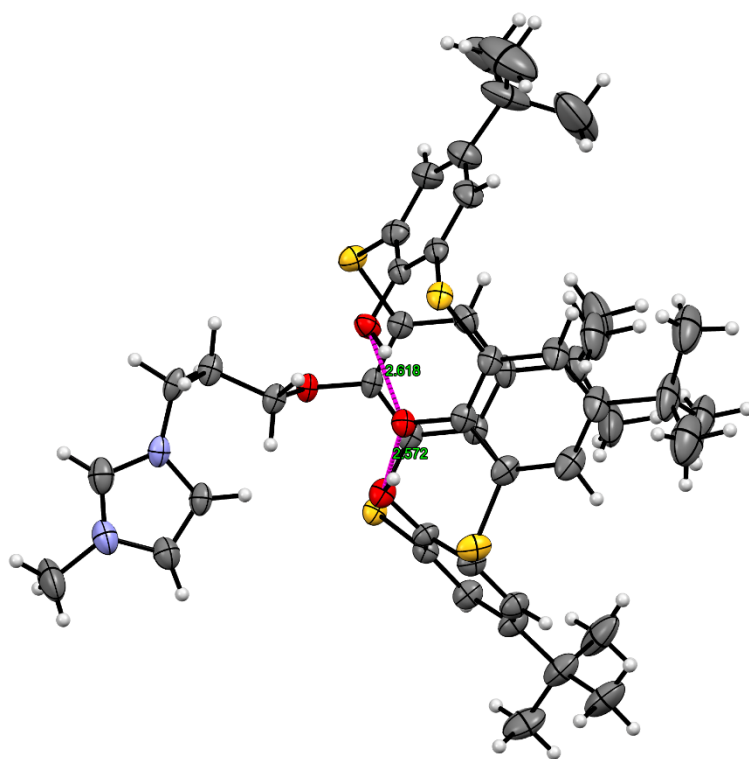

**Figure S1.** ORTEP representation of **2** showing 50% probability thermal ellipsoids. C atoms – grey, N atoms – blue, O atoms – red, S atoms – yellow.

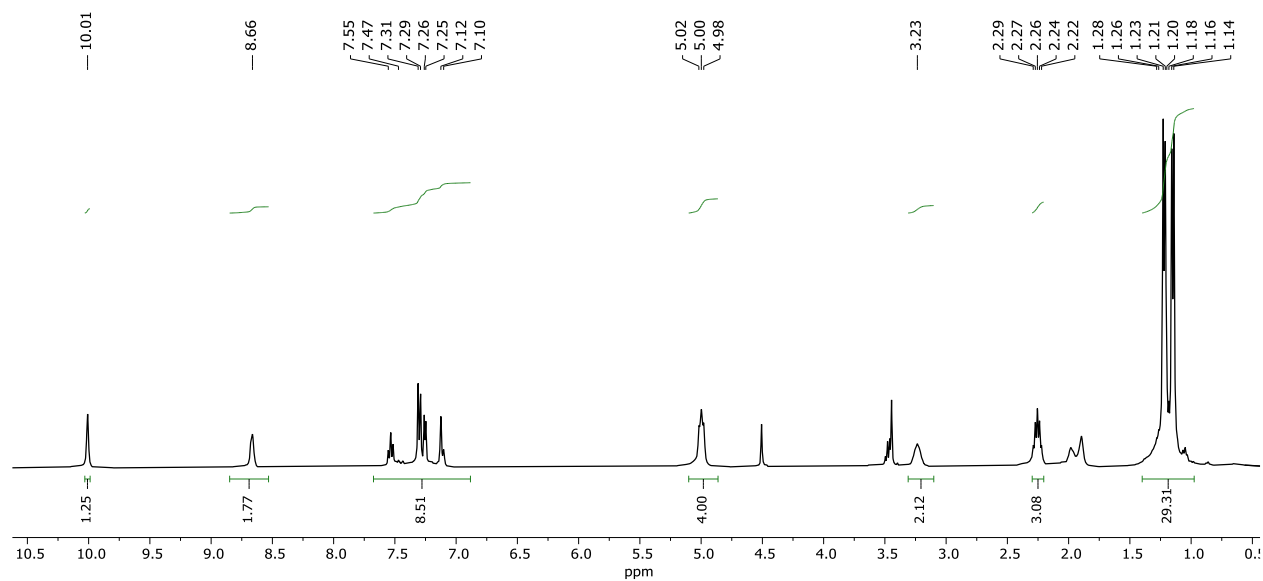

**(a)**

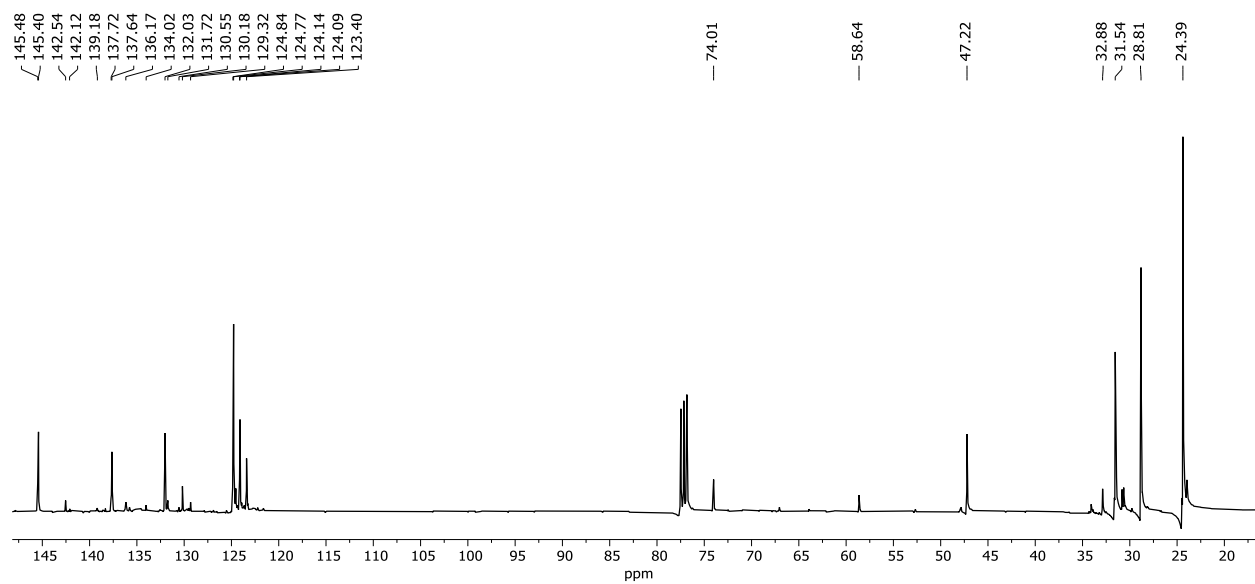

(b)

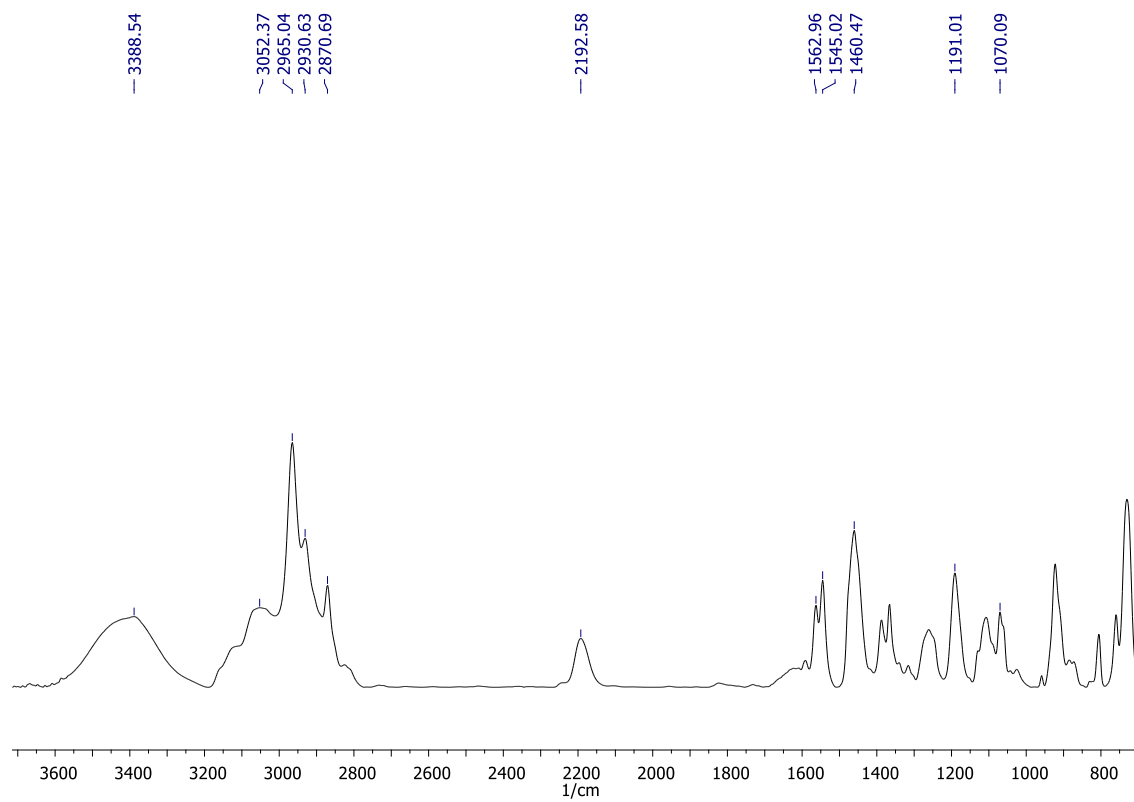

(c)

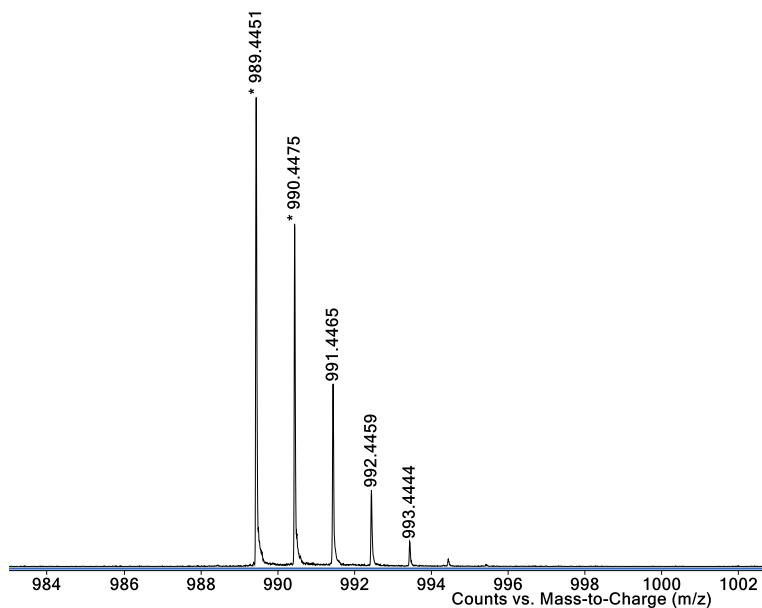

(d)

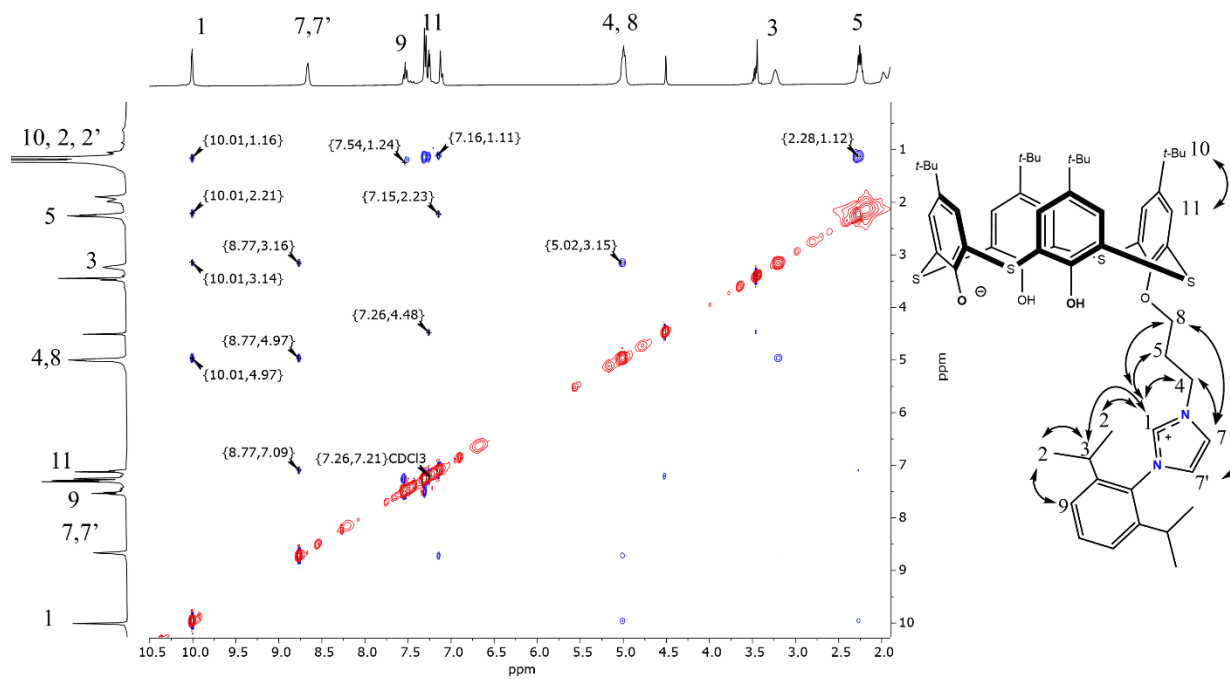

(e)

**Figure S2.** NMR  $^1\text{H}$  (a),  $^{13}\text{C}$  (b), FT IR (c), HR ESIMS (d) and NOESY ( $^1\text{H}$ - $^1\text{H}$ ) NMR spectra (e) of 5,11,17,23-tetra-*tert*-butyl-25, 27-dihydroxy-26-oxido-28-(3-(3-*N*-(2',6' di-*isopropylphenyl*)limidazolium)propoxy) -2,8,14,20-tetrathiacalix[4]arene (**3**)

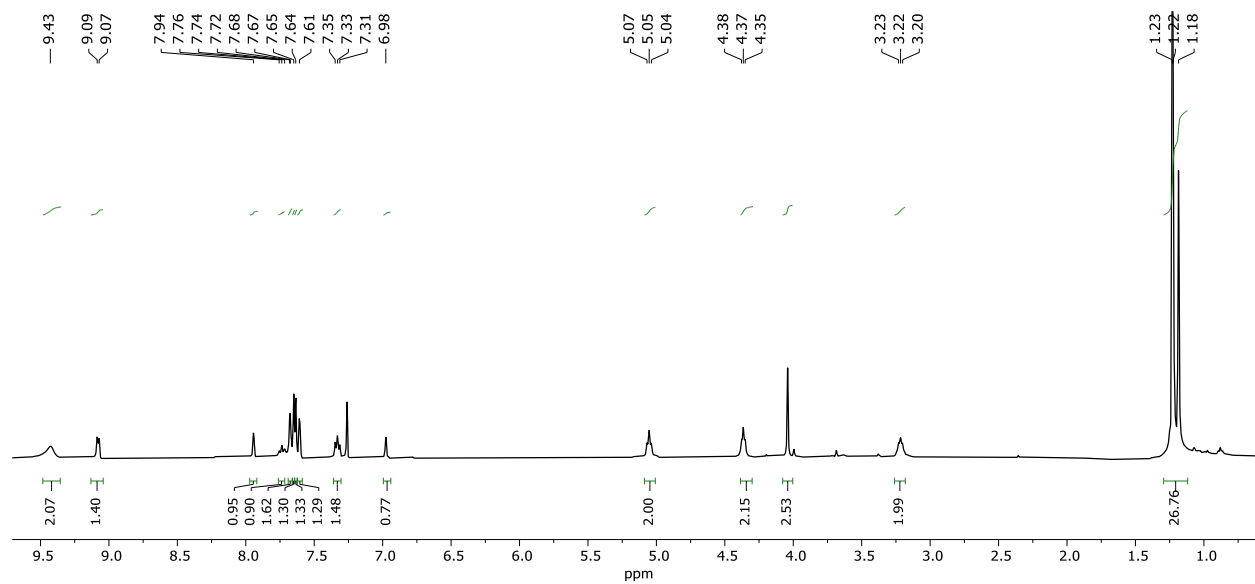

**(a)**

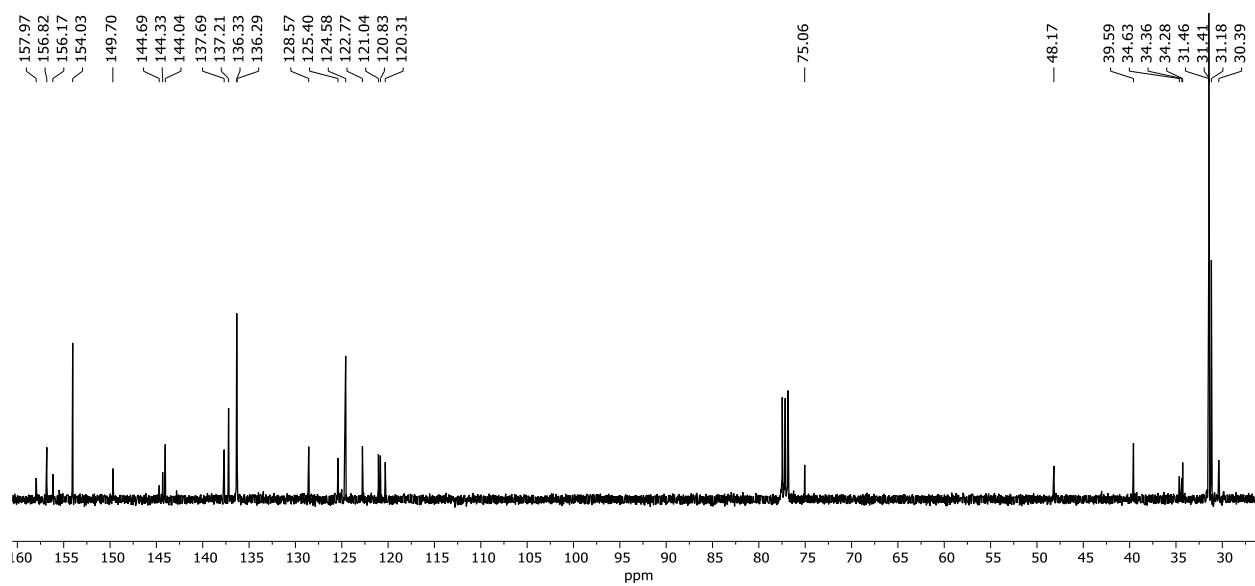

**(b)**

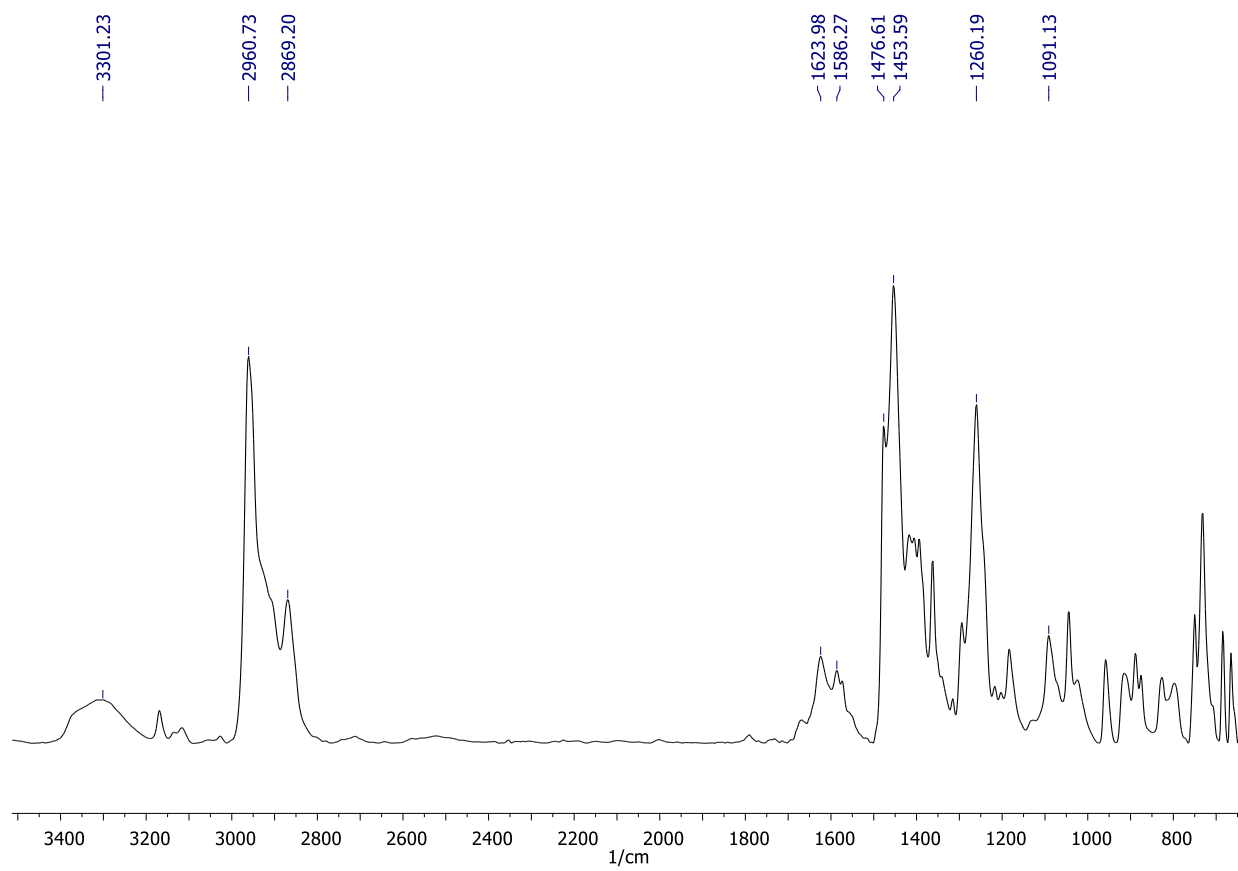

(c)

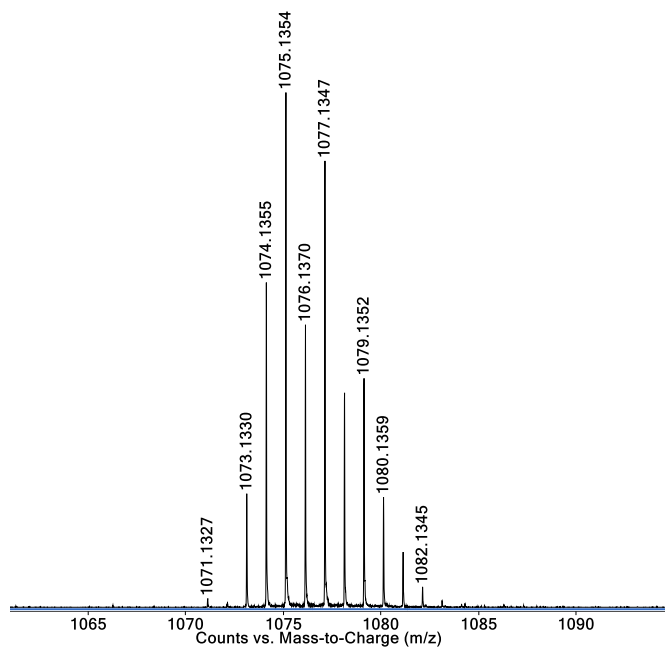

(d)

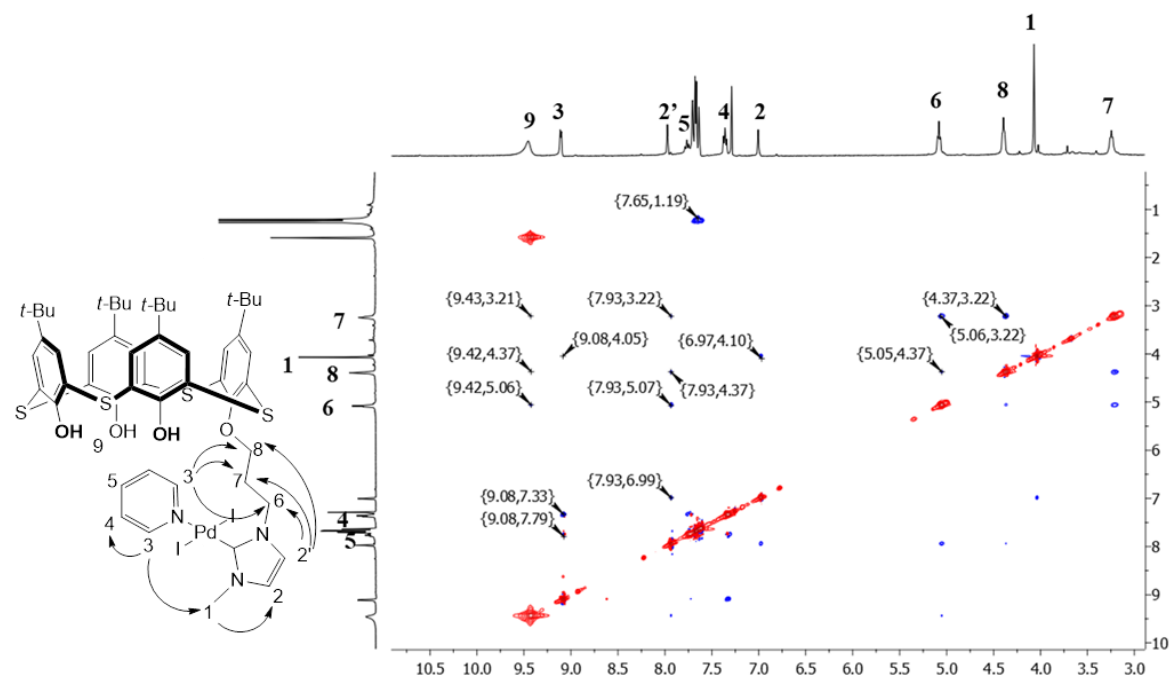

(e)

**Figure S3.** NMR  $^1\text{H}$  (a),  $^{13}\text{C}$  (b), FT IR (c), HR ESIMS (d) and NOESY ( $^1\text{H}$ - $^1\text{H}$ ) NMR spectra (e) of trans - {5,11,17,23-tetra-*tert*-butyl-25, 26, 27-trihydroxy-28-(3-(3-*N*-methylimidazolin-2-ylidene)propoxy) - 2,8,14,20-tetrathiocalix[4]arene }{pyridine} palladium(II) diiodide (**4**).

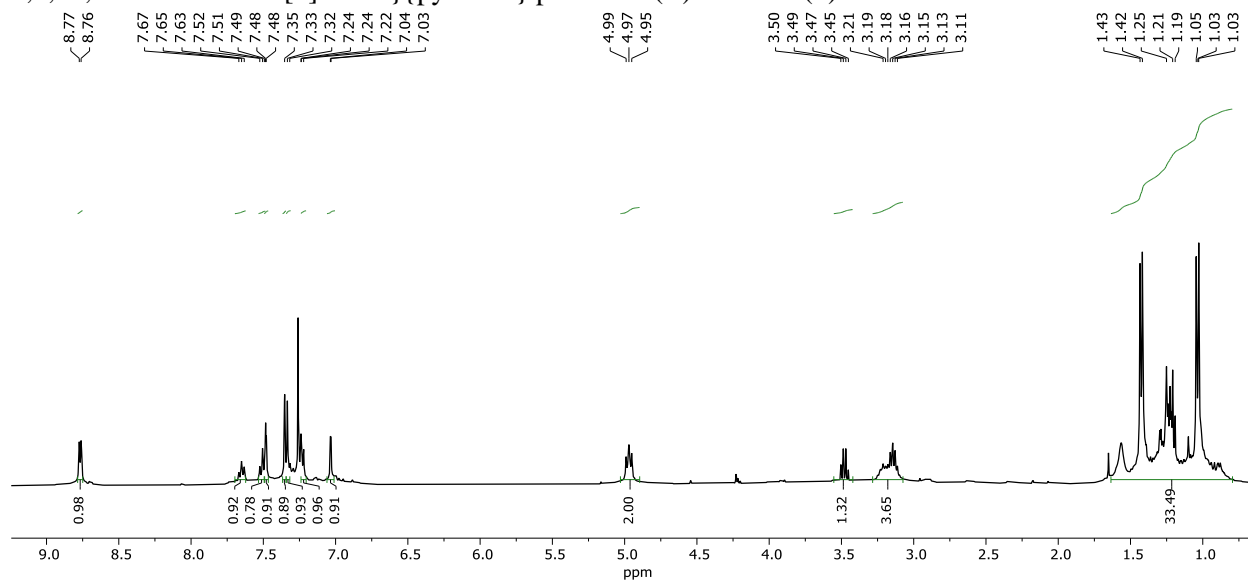

(a)

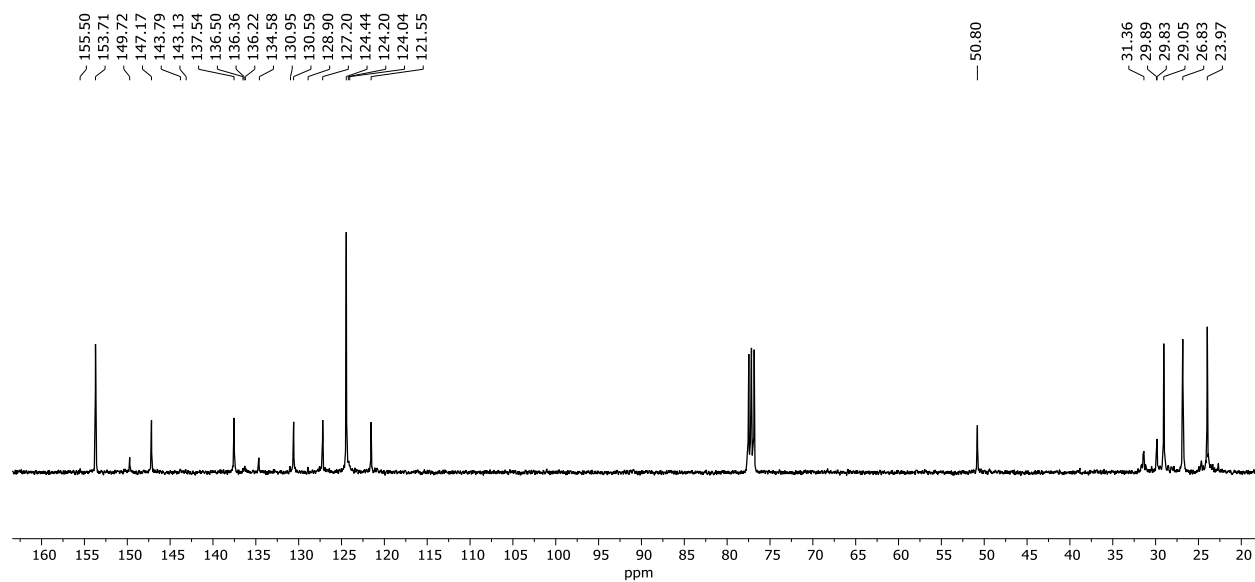

(b)

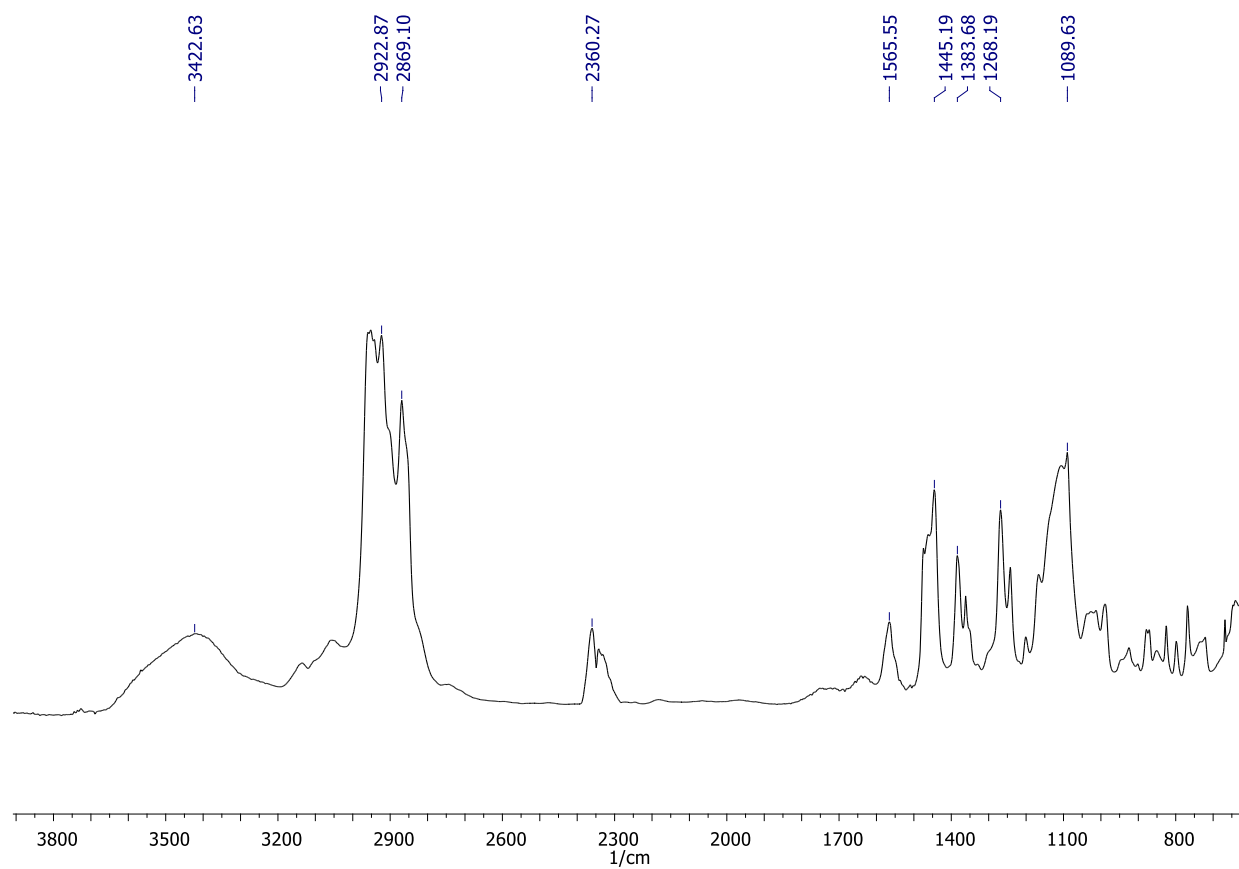

(c)



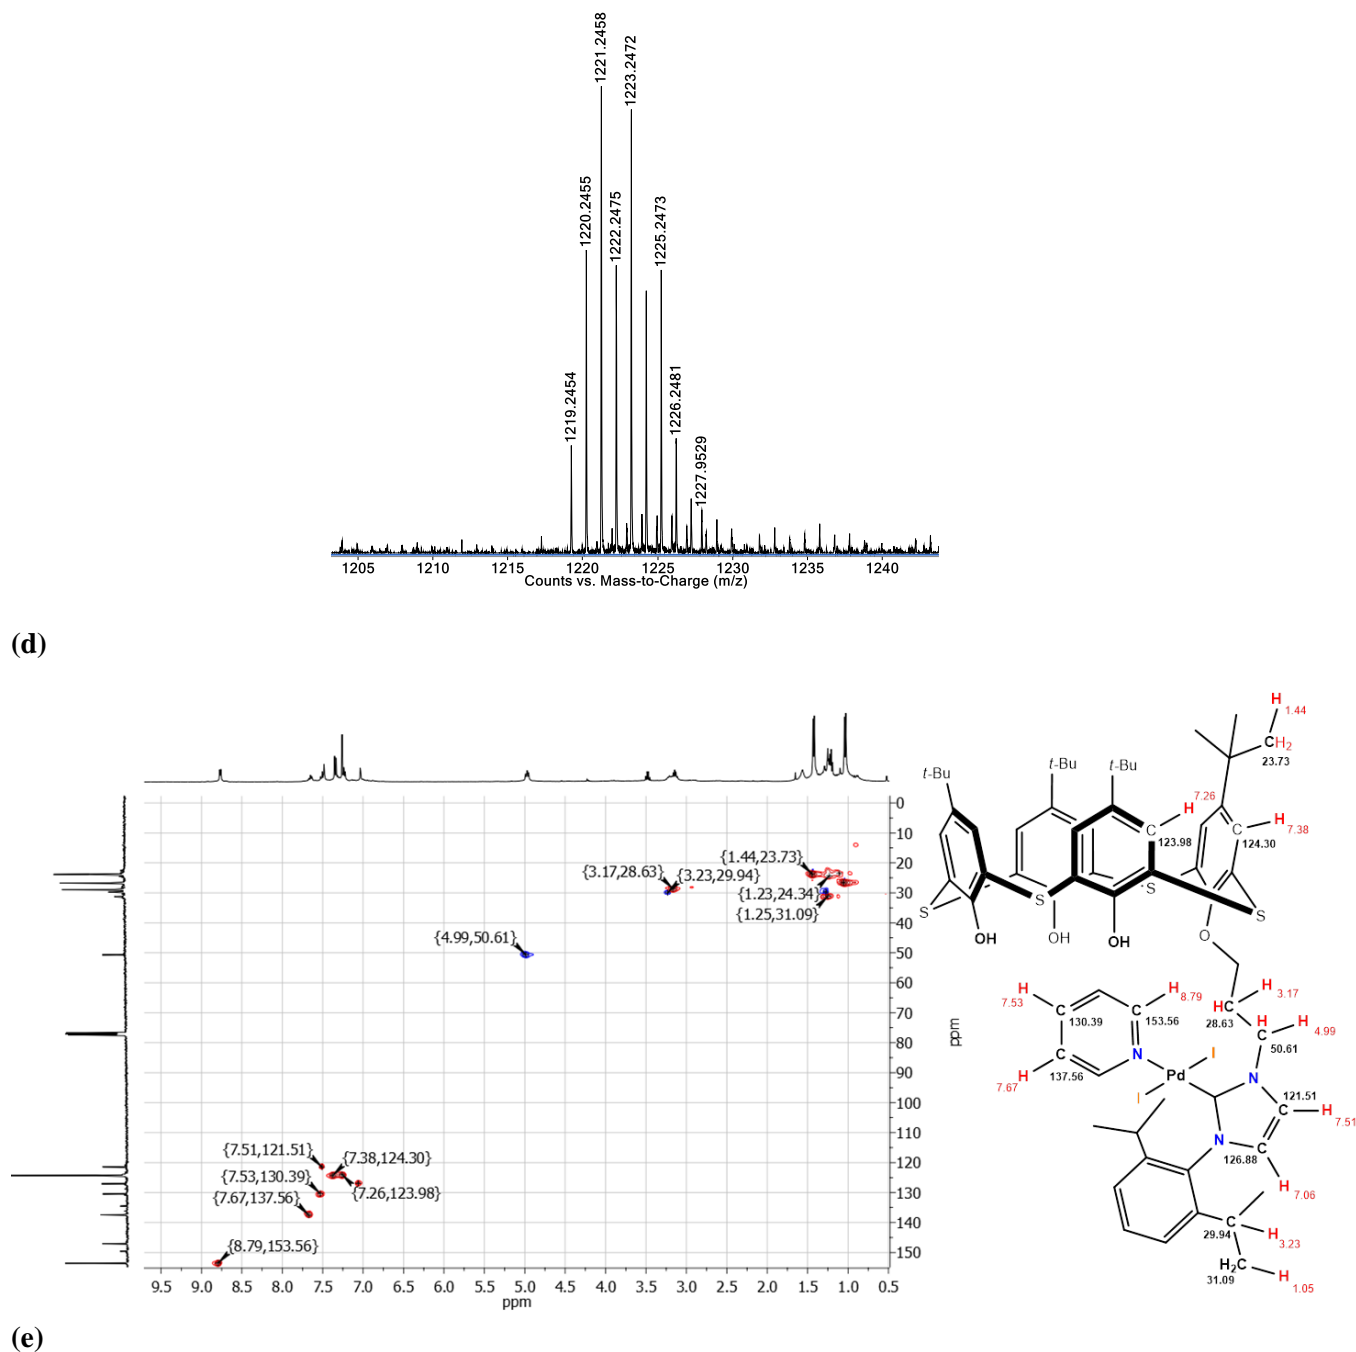

**Figure S4.** NMR  $^1\text{H}$  (a),  $^{13}\text{C}$  (b), FT IR (c), HR ESIMS (d) and HSQC ( $^1\text{H}$ - $^{13}\text{C}$ ) spectra (e) of trans - {5,11,17,23-tetra-*tert*-butyl-25, 26, 27-trihydroxy-28-(3-(3-N-(2',6' di-isopropylphenyl)imidazolin-2-ylidene)propoxy) -2,8,14,20-tetrathiacalix[4]arene } {pyri-dine} palladium(II) diiodide (**5**).
